# Supplementary material
Source: HighWire-hosted journal article supplement (https://ajnr-sso.highwirestaging.com/highwire/filestream/73534/field_highwire_adjunct_files/0/19-01051.pdf)
Supplement: 19-01051.pdf [file 19-01051.pdf]

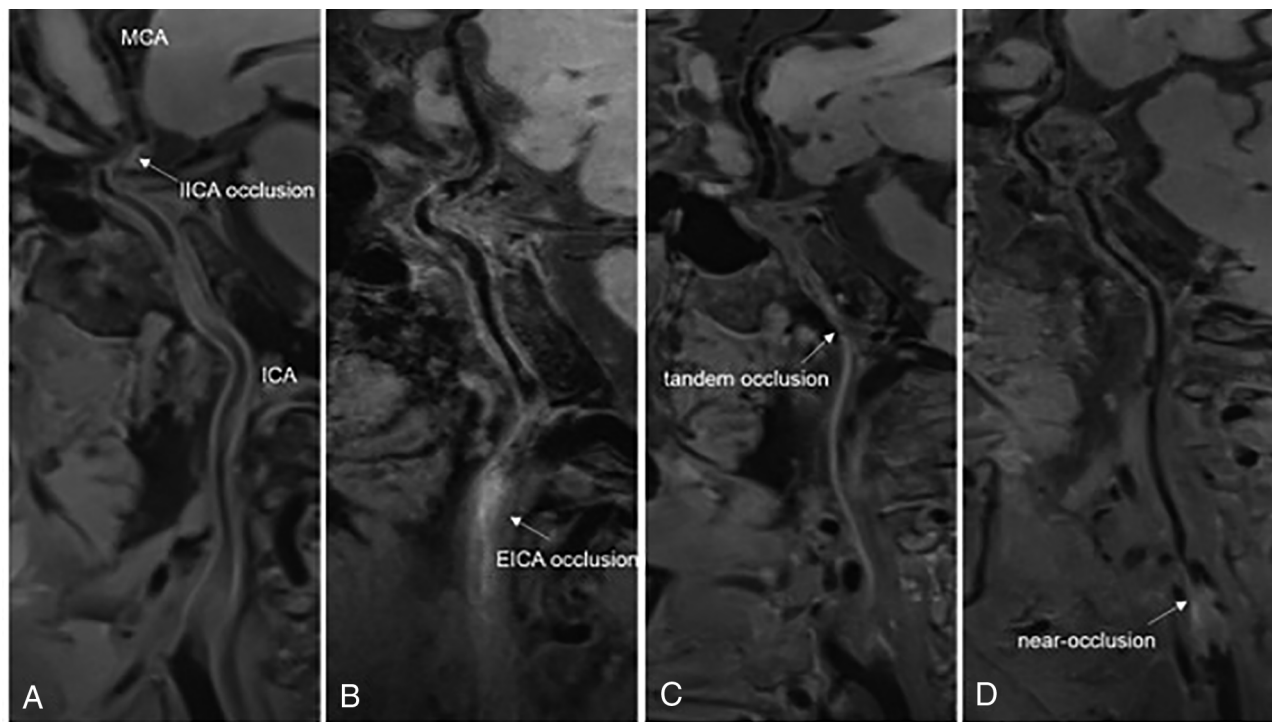

**ON-LINE FIG 1.** Sagittal reconstruction images for each occlusion type on HR-VWI. A, IICA occlusion at the supraclinoid segment of the ICA (*arrow*). B, EICA occlusion at the cervical segment with intraplaque hemorrhage (*arrow*). C, Tandem occlusion from the carotid bulb to the clinoid segment (*arrow*). D, Near-occlusion (*arrow*) with carotid bulb plaque.

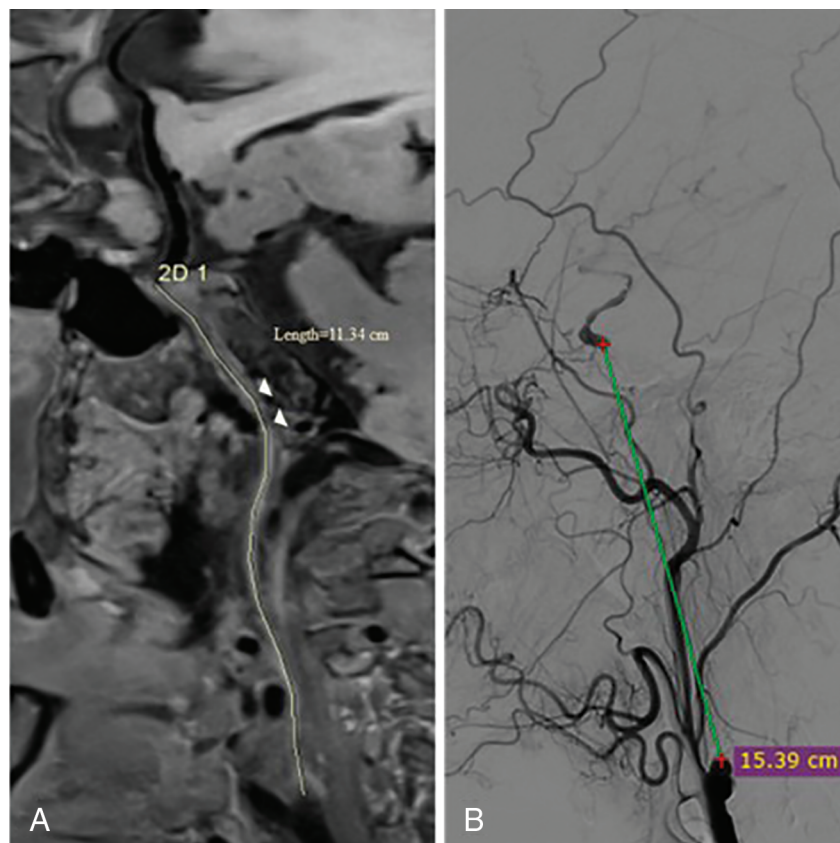

**ON-LINE FIG 2.** The Measurement method of occlusion length on HR-VWI and DSA. The length of occlusion measured on HR-VWI was 11.34 cm (A), shorter than that of DSA (15.39 cm) (B).

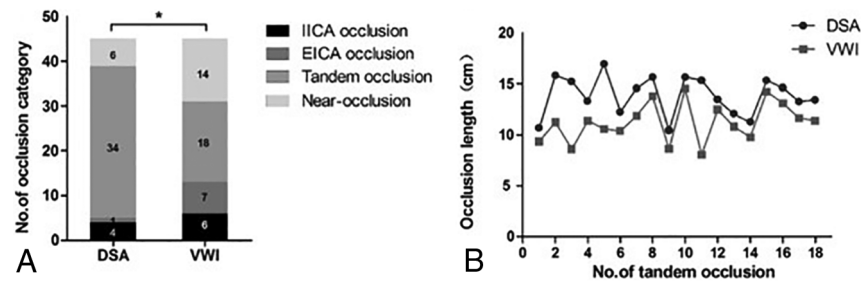

**ON-LINE FIG 3.** Comparison between HR-VWI and DSA in the occlusion category (A) and length (B) of the ICA. The length of the occlusion measured on HR-VWI was shorter than that on DSA ( $P < .001$ ).

**On-line Table 1: MR imaging parameters**

|                        | DWI       | TOF-MRA   | IR-SPACE  |
|------------------------|-----------|-----------|-----------|
| FOV (mm <sup>2</sup> ) | 220 × 220 | 250 × 204 | 240 × 210 |
| Matrix size            | 180 × 180 | 320 × 223 | 384 × 336 |
| Thickness (mm)         | 5.00      | 0.90      | 0.55      |
| TR/TE (ms)             | 4000/93   | 21/3.42   | 900/15    |
| Bandwidth (Hz/Px)      | 1262      | 185       | 465       |
| Scan time (s)          | 62        | 369       | 463       |

**On-line Table 2: Patient baseline demographics and characteristics<sup>a</sup>**

| Demographics/Characteristics                   | Total (n = 45) |
|------------------------------------------------|----------------|
| Age (yr)                                       | 62 (53.5–66.5) |
| Men                                            | 39 (86.7)      |
| Hypertension                                   | 26 (57.8)      |
| Hyperlipidemia                                 | 8 (17.8)       |
| Diabetes mellitus                              | 16 (35.6)      |
| Coronary disease                               | 6 (13.3)       |
| Smoking                                        | 22 (48.9)      |
| Drinking (alcohol)                             | 17 (37.8)      |
| Prior stroke                                   | 19 (42.2)      |
| ALS                                            | 12 (26.7)      |
| Baseline NIHSS                                 | 1 (0–2.5)      |
| Interval from of HR-VWI to symptom onset (day) | 26 (15–67)     |
| Interval between HR-VWI and DSA (day)          | 6 (1–15)       |

**Note:**—ALS indicates acute ischemic stroke.

<sup>a</sup> Values are presented as No. (%) or median (range).

**On-line Table 3: Interobserver agreement coefficients regarding the occlusion category, reconstitution, and suitability for recanalization on HR-VWI and DSA<sup>a</sup>**

|                                | Interobserver Agreement $\kappa$ (95% CI) |                     | P Value |
|--------------------------------|-------------------------------------------|---------------------|---------|
|                                | HR-VWI                                    | DSA                 |         |
| Occlusion types                | 0.968 (0.907–1.000)                       | 0.897 (0.758–1.000) | <.0001  |
| Reconstitution                 | 0.970 (0.913–1.000)                       | 0.971 (0.915–1.000) | <.0001  |
| Suitability for recanalization | 0.892 (0.746–1.000)                       | 0.947 (0.845–1.000) | <.0001  |

<sup>a</sup> Occlusion types include IICA occlusion, EICA occlusion, tandem occlusion, and near-occlusion. “Reconstitution” was defined as the ICA distal to the occlusion being visible. Agreement coefficients were interpreted according to methods described by Kundel and Polansky<sup>25</sup> ( $\kappa < 0$ , poor;  $\kappa = -0.20$ , slight;  $\kappa = 0.21$ –0.40, fair;  $\kappa = 0.41$ –0.60, moderate;  $\kappa = 0.61$ –0.80, substantial; and  $\kappa = 0.81$ –1.00, almost perfect).
